# Supplementary material
Source: ML conference proceedings conference paper supplement (https://proceedings.neurips.cc/paper_files/paper/2019/hash/ac52c626afc10d4075708ac4c778ddfc-Abstract.html)
Supplement: Supplementary file [file ac52c626afc10d4075708ac4c778ddfc-Supplemental.zip]

# Optimal Sparse Decision Trees

Xiyang Hu, Cynthia Rudin, Margo Seltzer

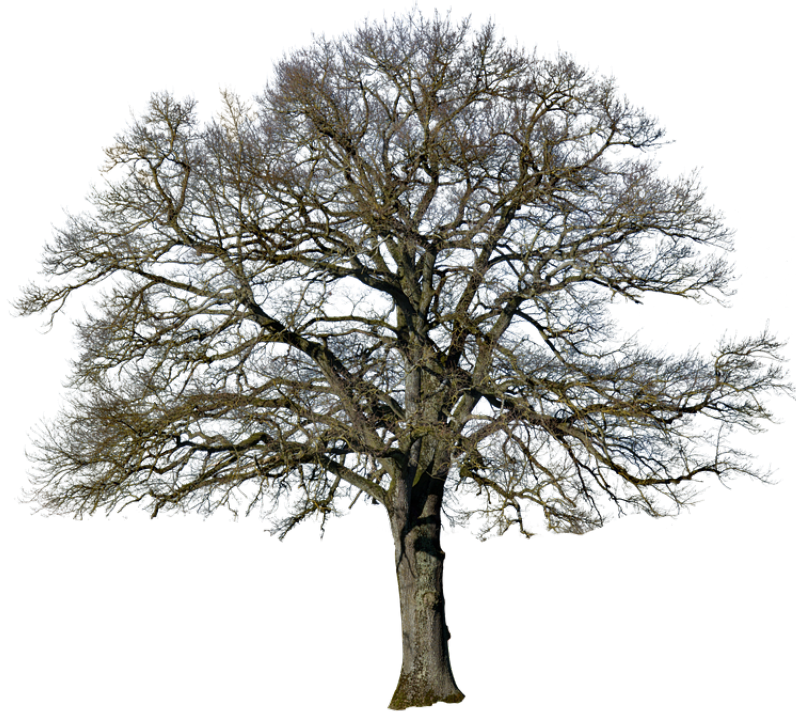

# Optimal Sparse Decision Trees

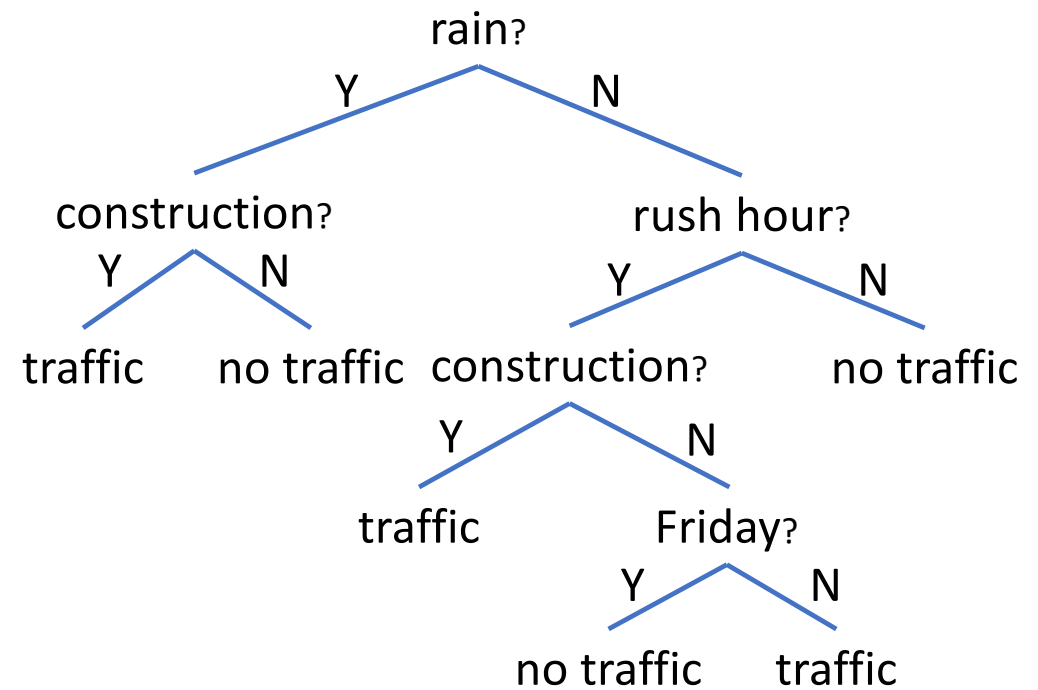

# Optimal Sparse Decision Trees

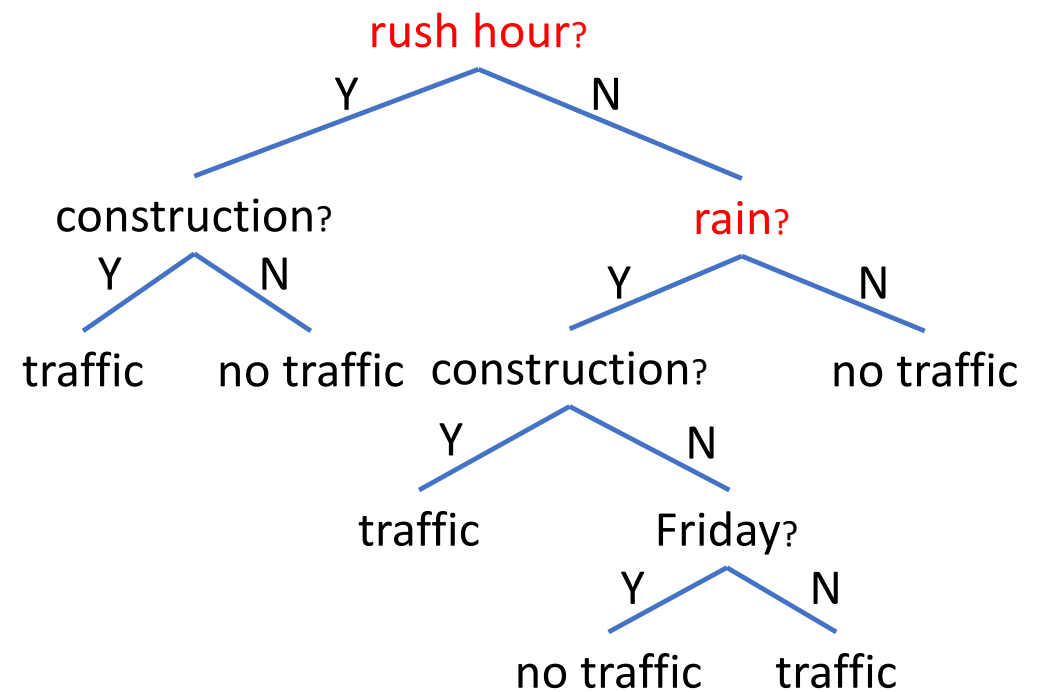

# Optimal Sparse Decision Trees

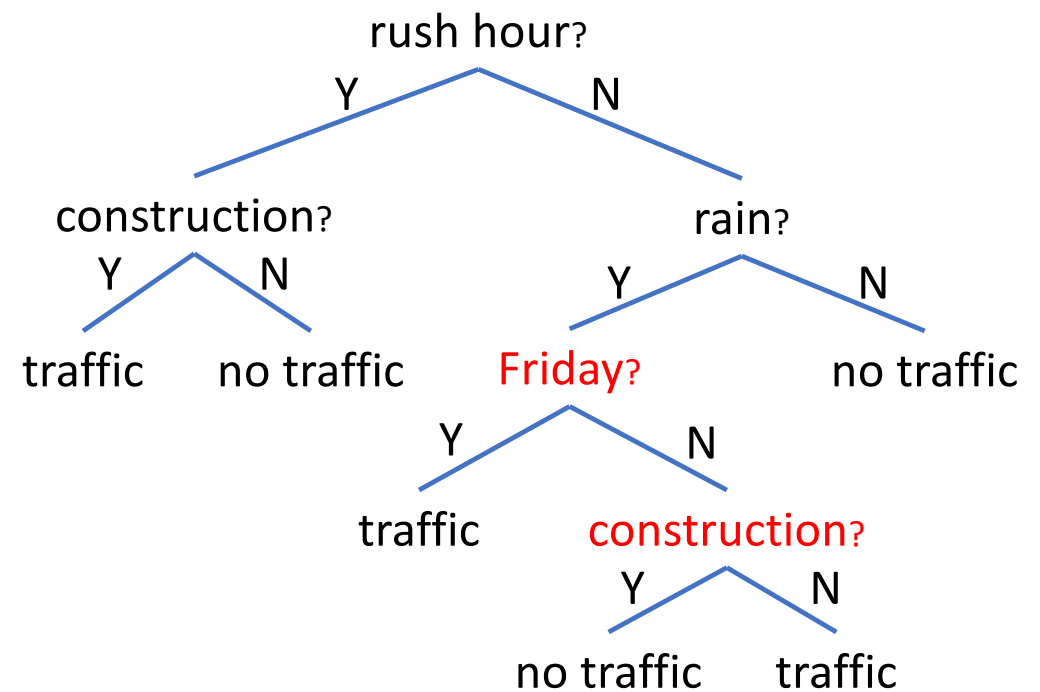

# Optimal Sparse Decision Trees

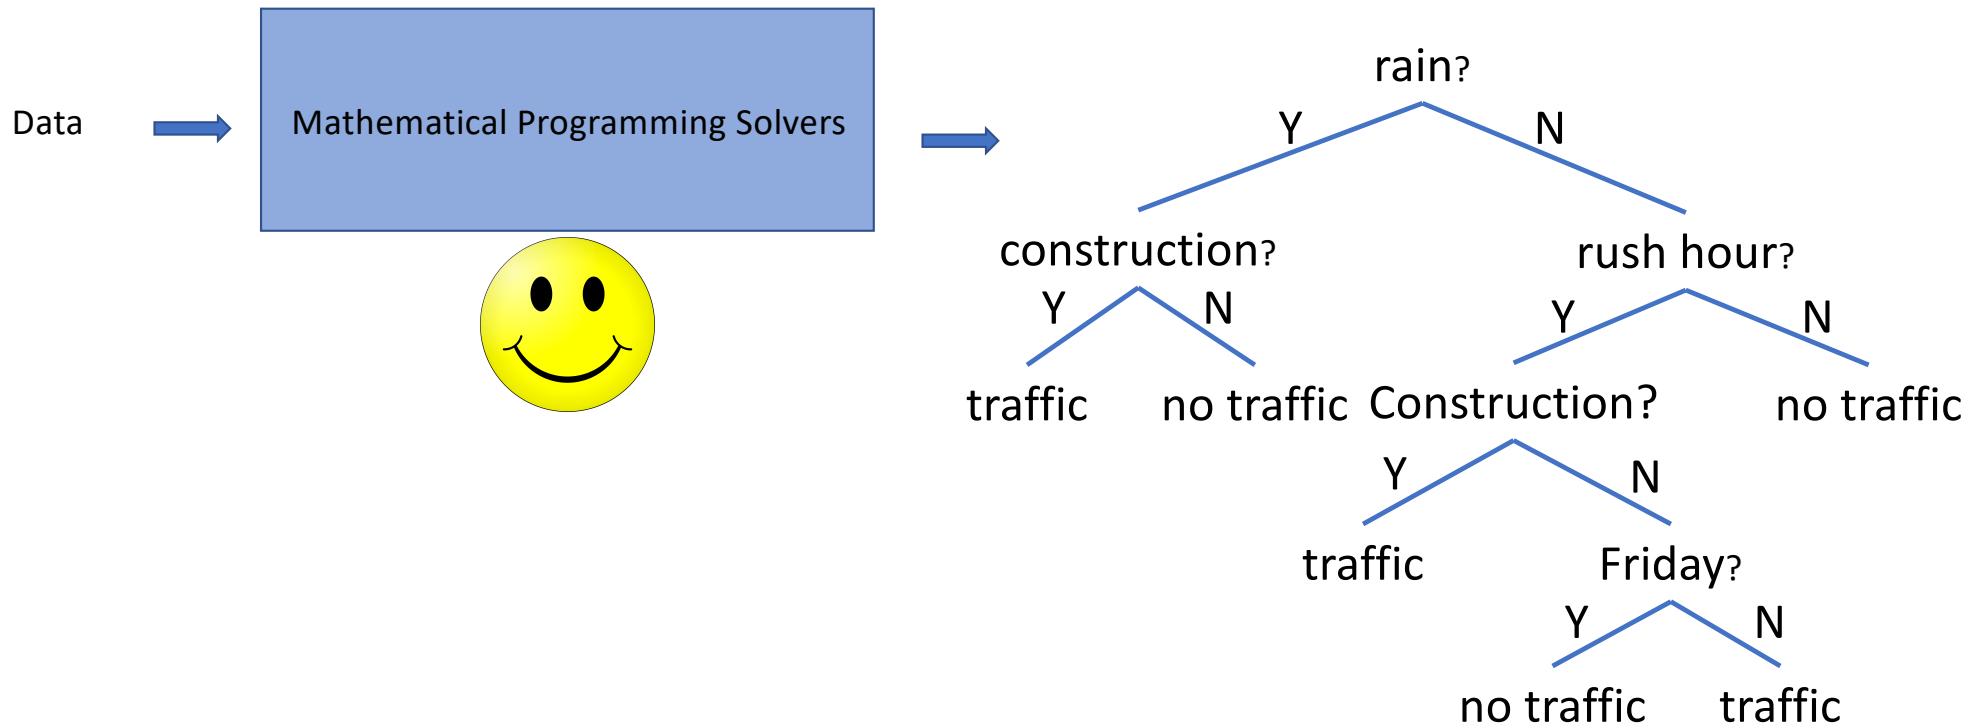

# Optimal Sparse Decision Trees

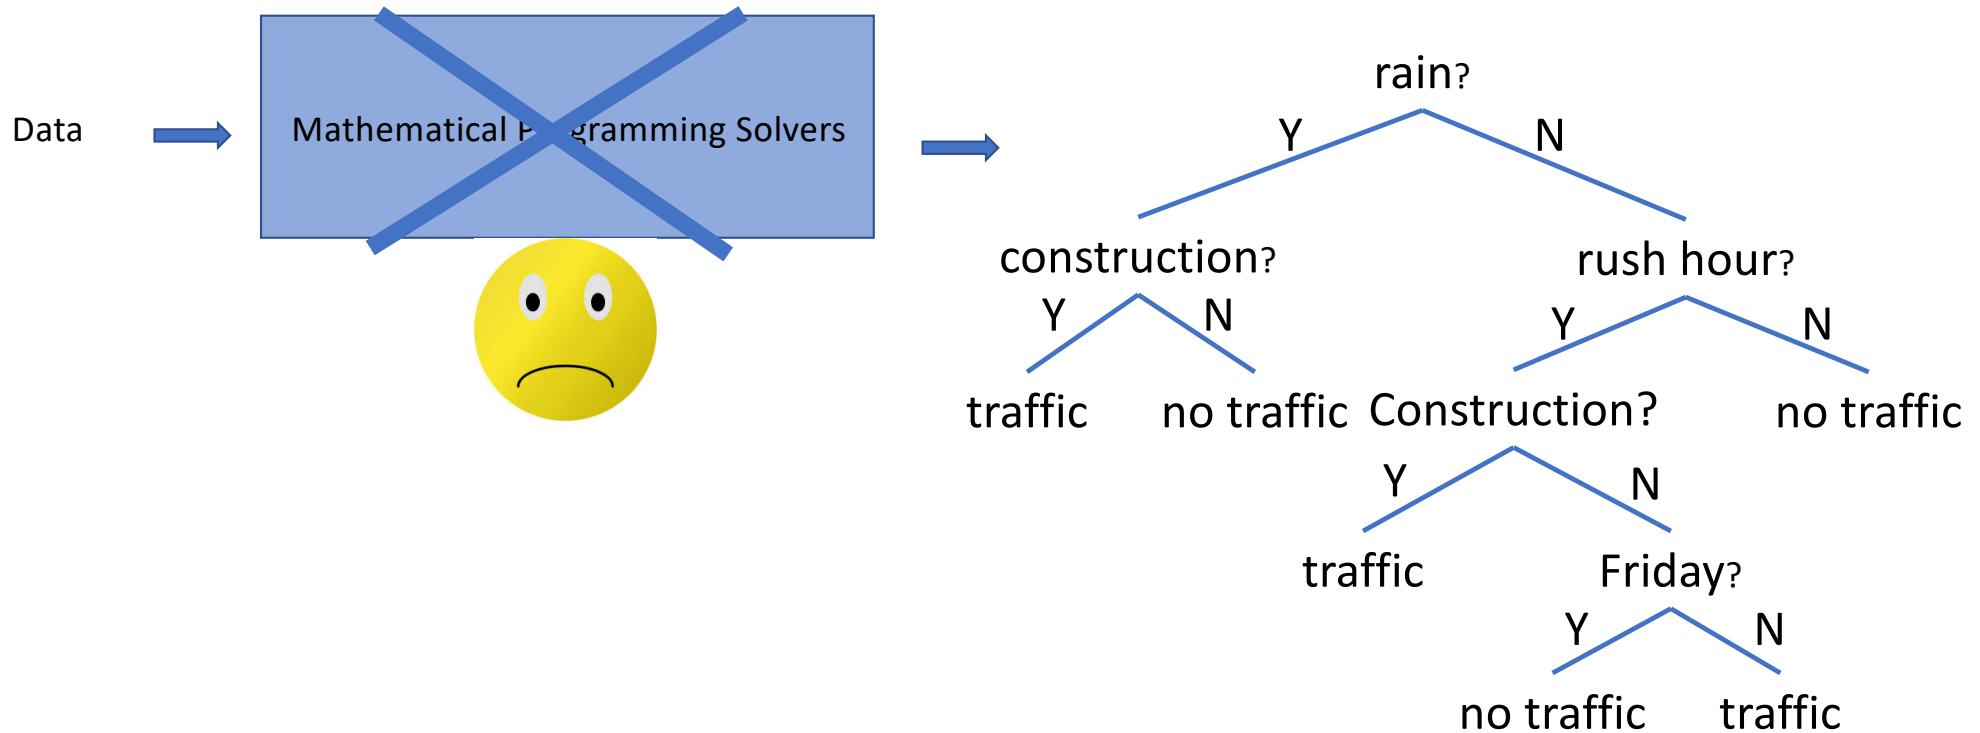

# Optimal Sparse Decision Trees

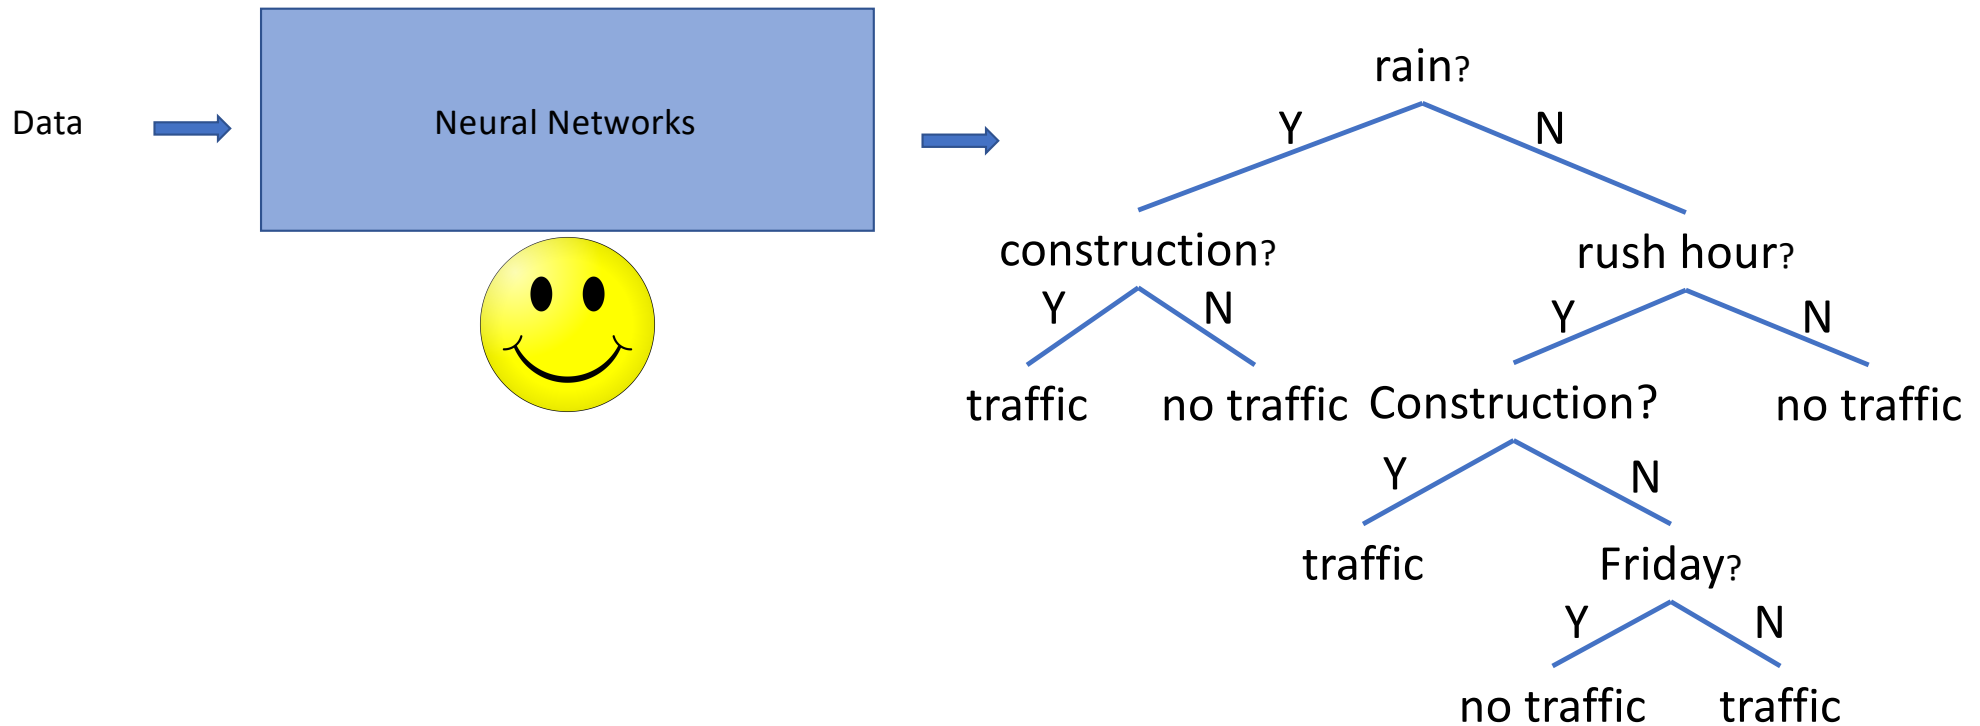

# Optimal Sparse Decision Trees

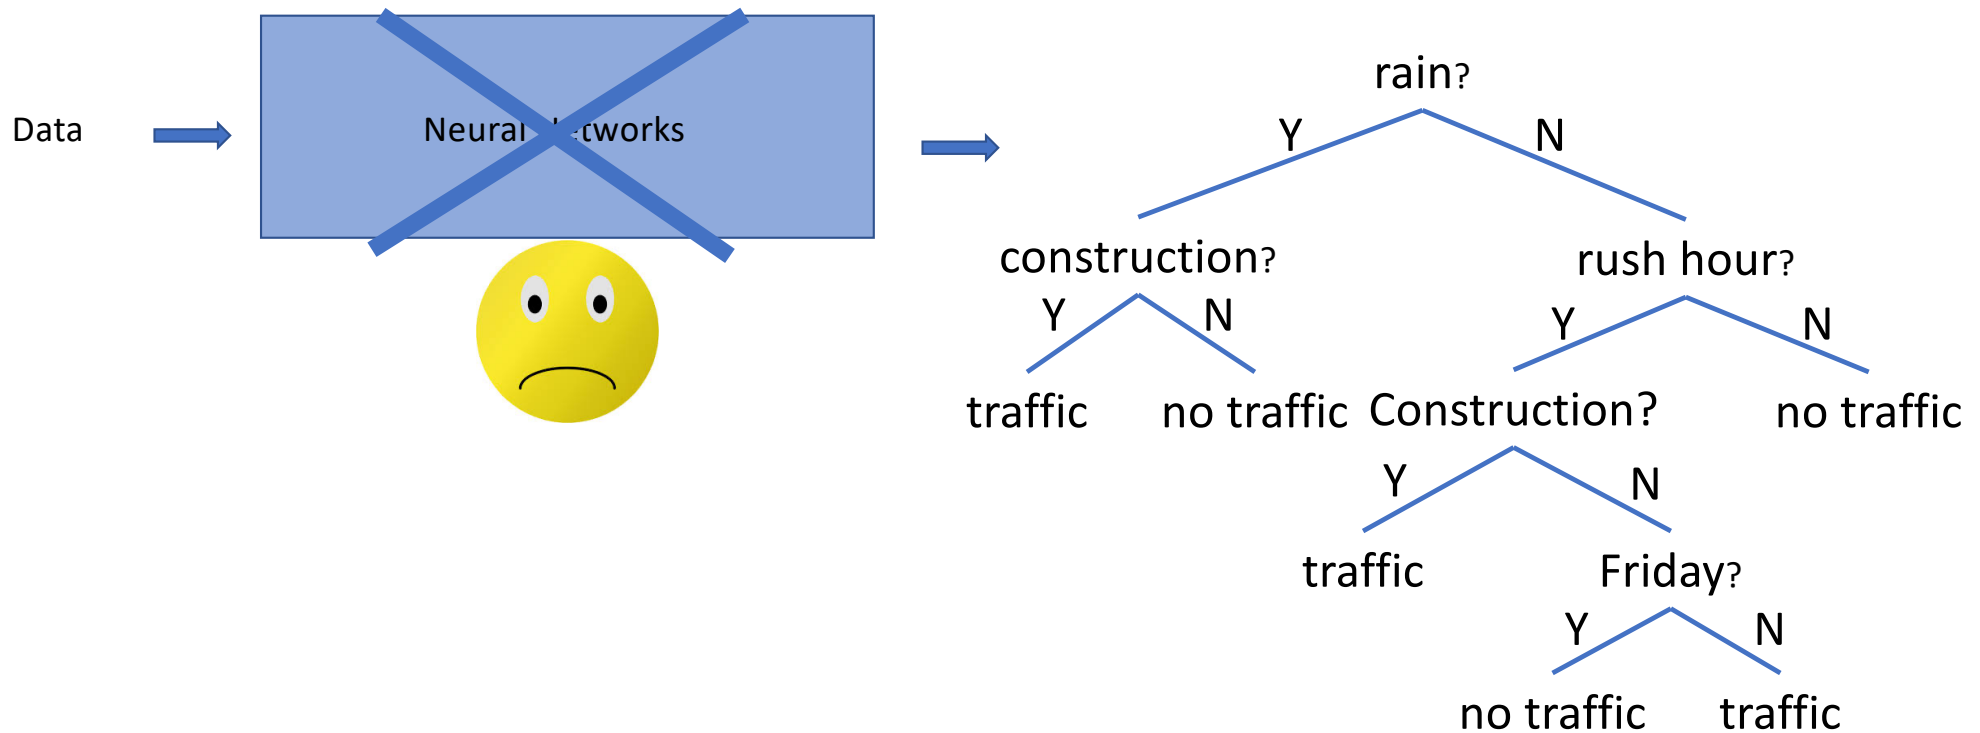



# Optimal Sparse Decision Trees

$\min_{\text{tree}} \hat{L}(\text{tree}, \{(x_i, y_i)\}_i)$  where

$$\hat{L}(\text{tree}, \{(x_i, y_i)\}_i) = \underbrace{\frac{1}{n} \sum_{i=1}^n 1_{[\text{tree}(x_i) \neq y_i]}}_{\text{Misclassification error}} + \underbrace{C(\# \text{ leaves in tree})}_{\text{Sparsity}}$$

We solve this to optimality.

No greedy splitting and pruning like C4.5 and CART

The key: very efficient branch & bound combined with computer systems.

# Optimal Sparse Decision Trees

$\min_{\text{tree}} \hat{L}(\text{tree}, \{(x_i, y_i)\}_i)$  where

$$\hat{L}(\text{tree}, \{(x_i, y_i)\}_i) = \underbrace{\frac{1}{n} \sum_{i=1}^n 1_{[\text{tree}(x_i) \neq y_i]}}_{\text{Misclassification error}} + \underbrace{C(\# \text{ leaves in tree})}_{\text{Sparsity}}$$

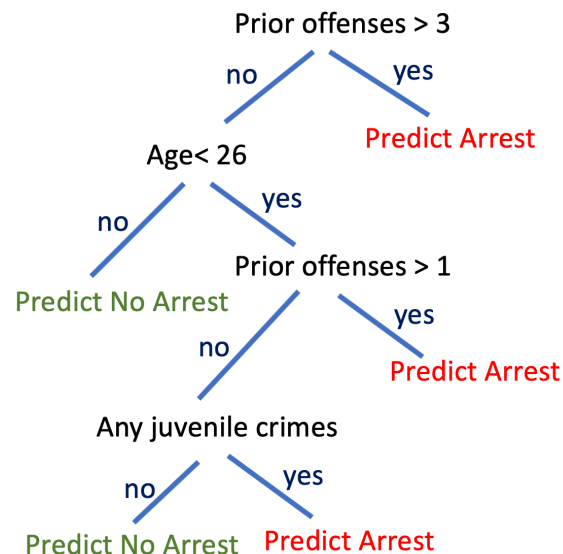

← An example of an optimal tree on the re-arrest data

# Optimal Sparse Decision Trees

## Analytical Bounds Reduce the Search Space

This collection of theorems show that some partial trees can never be extended to form optimal trees.

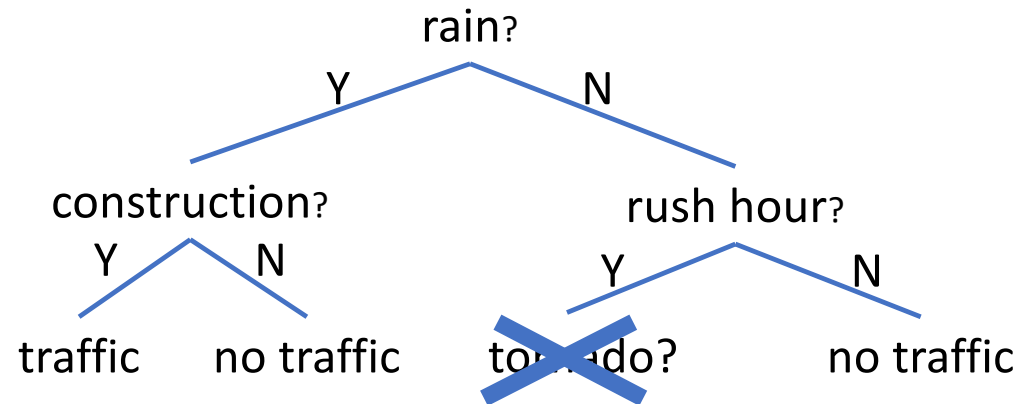

Not enough data

Not accurate data

Too many leaves

# Optimal Sparse Decision Trees

## Represent a tree by its leaves

rain & construction & traffic

rain & no construction & no traffic

no rain & rush hour & construction & traffic

no rain & rush hour & no construction & Friday and no traffic

no rain & rush hour & no construction & Friday and traffic

no rain & no rush hour & no traffic

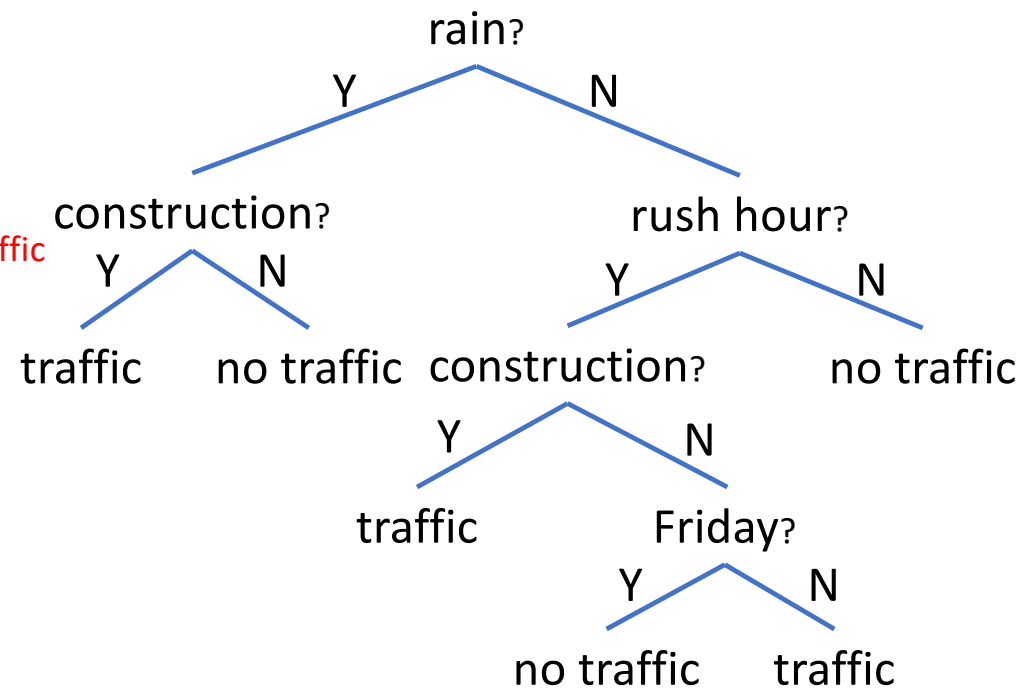

# Optimal Sparse Decision Trees

Permutation map: Discover identical trees already evaluated

rain & construction & traffic

rain & no construction & no traffic

no rain & rush hour & construction & traffic

no rain & rush hour & no construction & Friday and no traffic

no rain & rush hour & no construction & Friday and traffic

no rain & no rush hour & no traffic

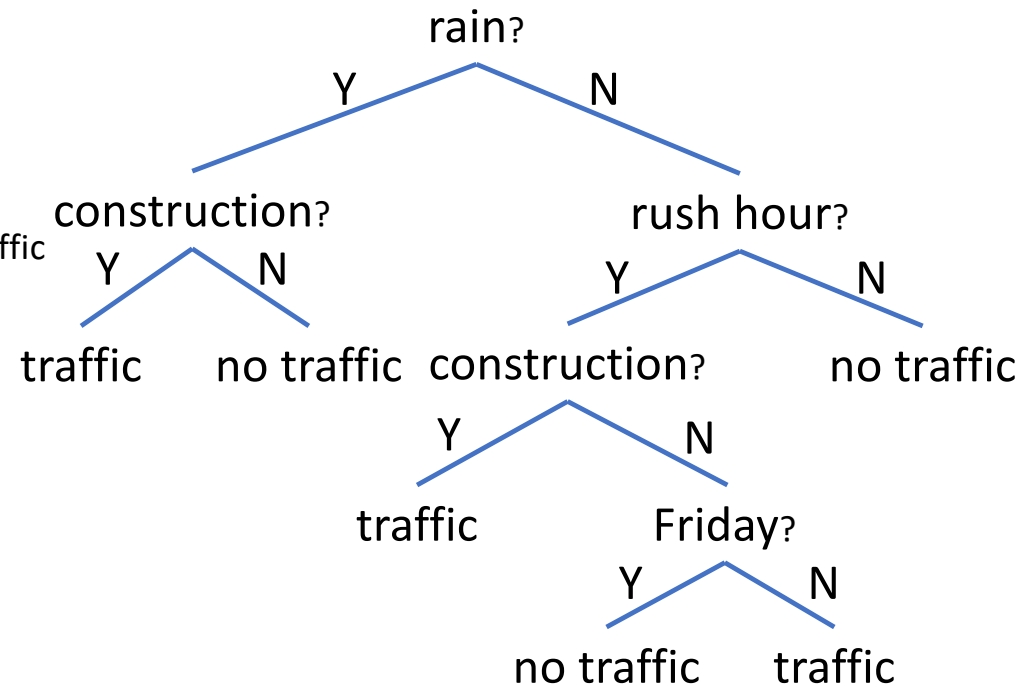

# Optimal Sparse Decision Trees

Bit-vectors describe data represented by each leaf

rain & construction & traffic

[1000010001001110000.....0]

rain & no construction & no traffic

[0110001000000000110.....1]

no rain & rush hour & construction & traffic

[0001000100000001000.....0]

no rain & rush hour & no construction & Friday and no traffic

[0000100000000000001.....0]

no rain & rush hour & no construction & Friday and traffic

[0000000010000000000.....0]

no rain & no rush hour & no traffic

[0000000000011000000.....0]



# Optimal Sparse Decision Trees

## Incremental computation of objective and bounds

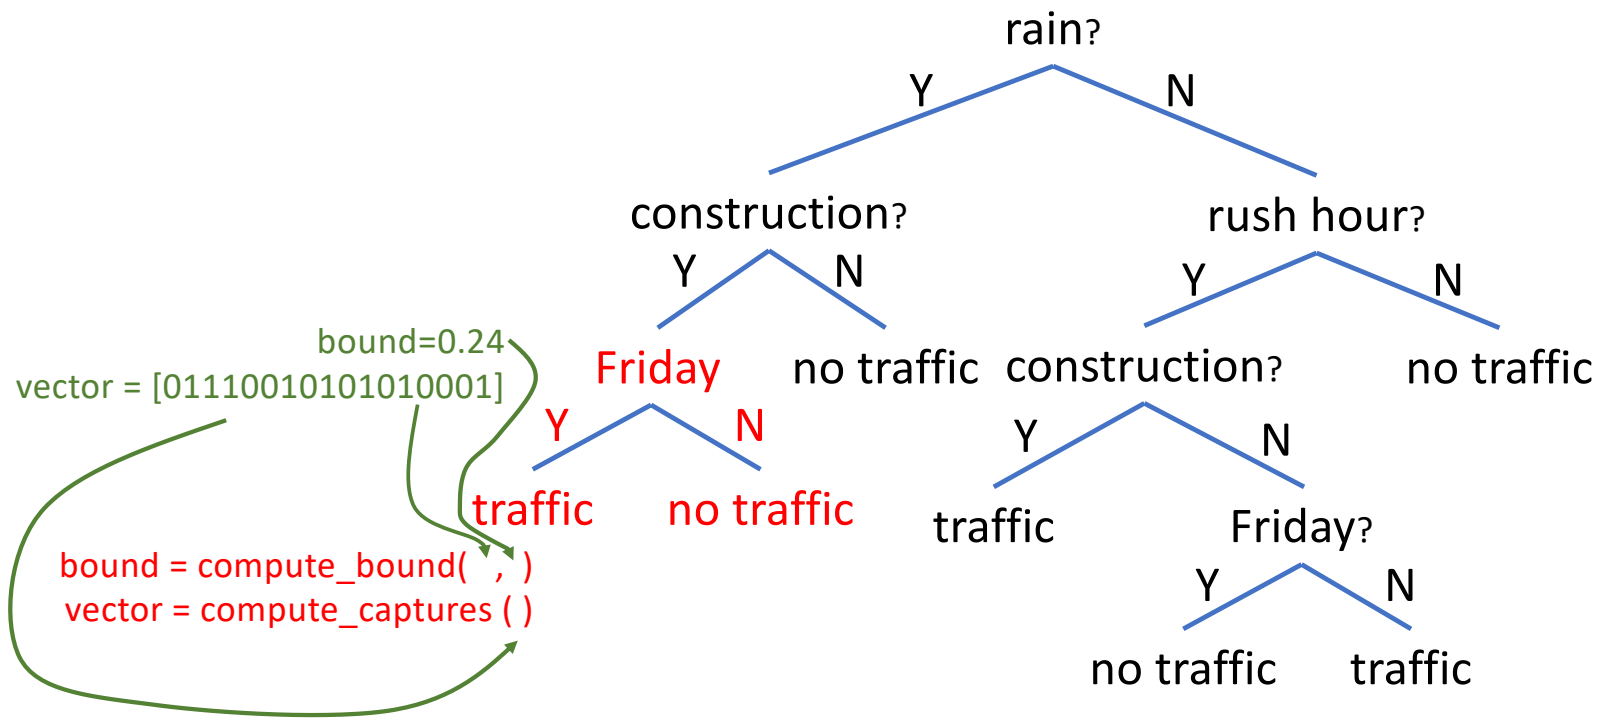

# Optimal Sparse Decision Trees

Strong analytical bounds

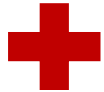

Leaf-based representation

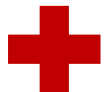

Permutation map

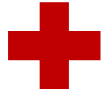

Caching of intermediate results

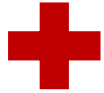

Incremental computation

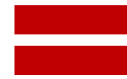

Fast Implementation



# Classification Accuracy of Monk1 Dataset

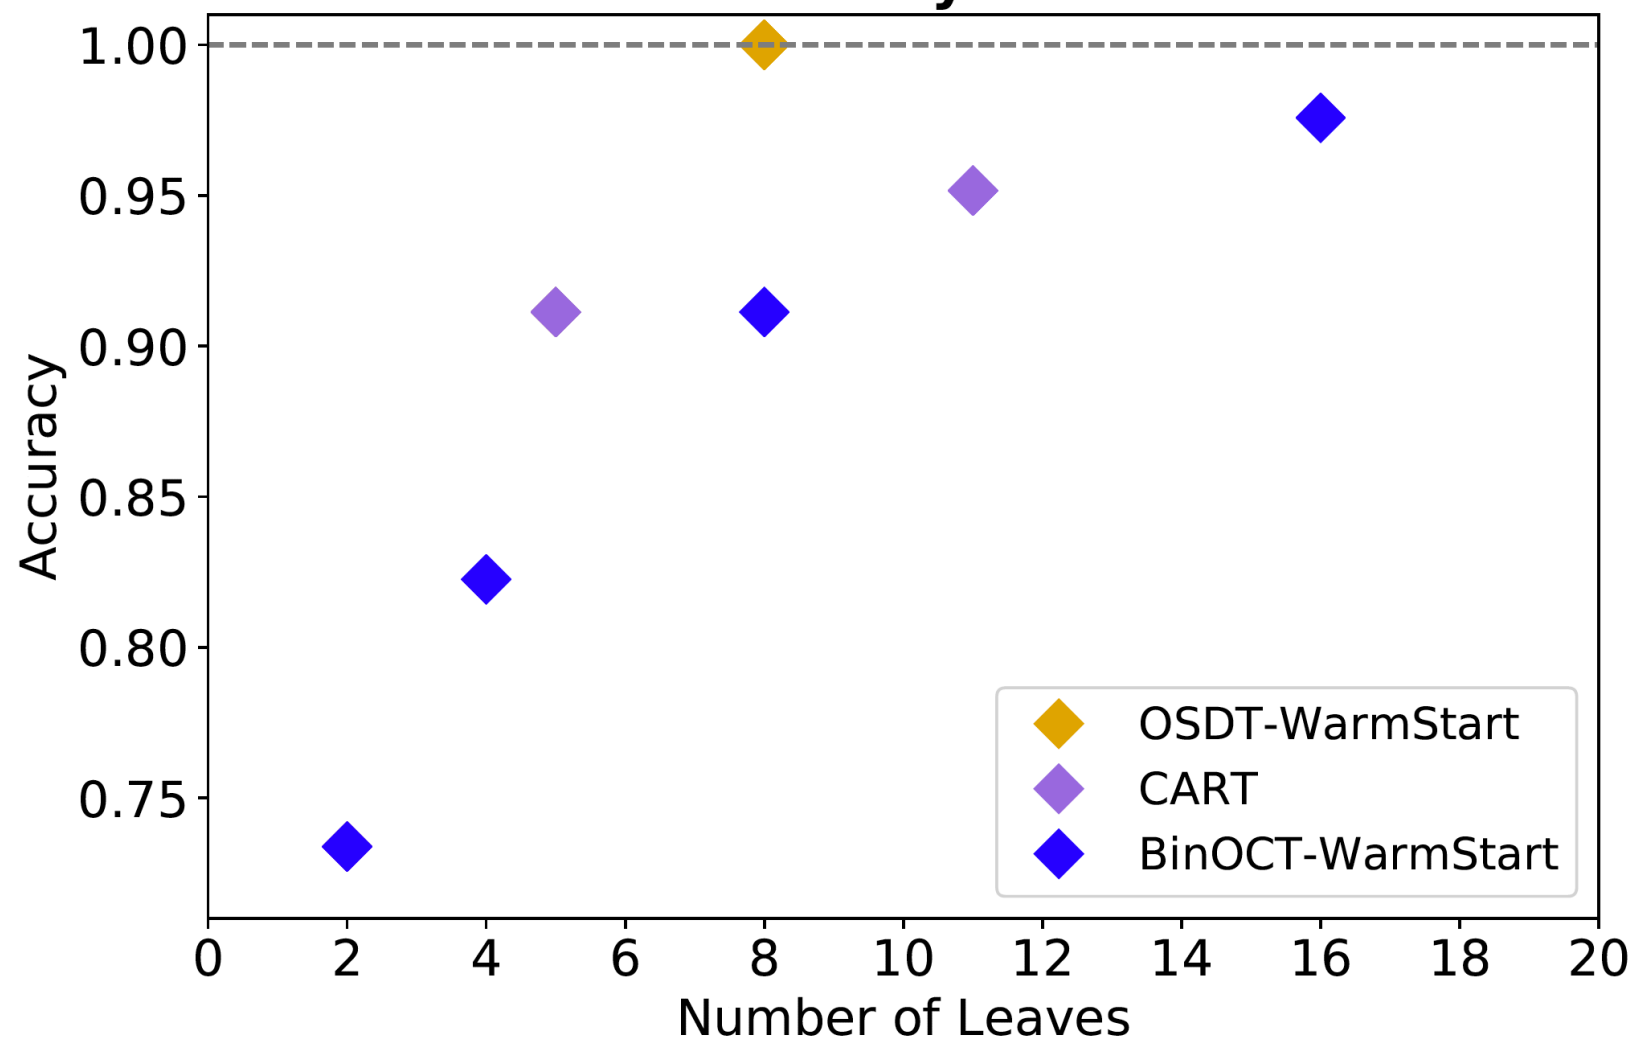

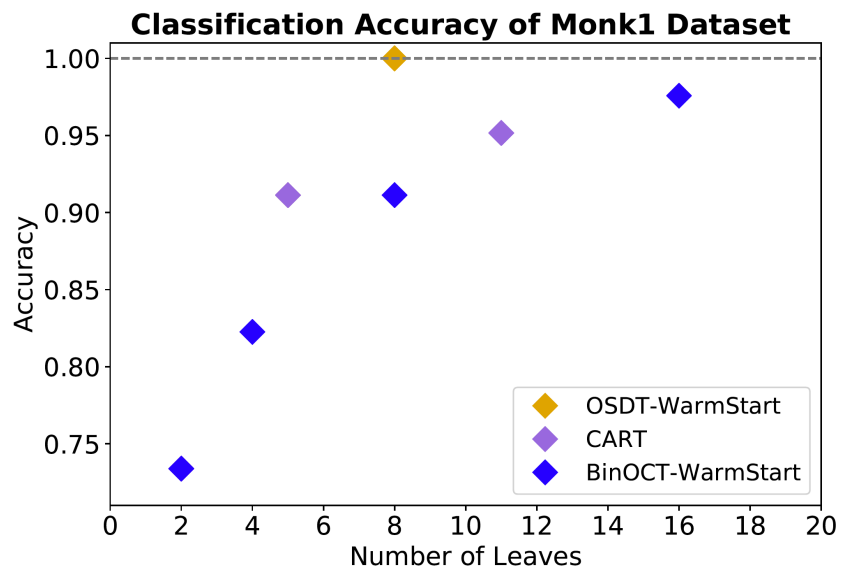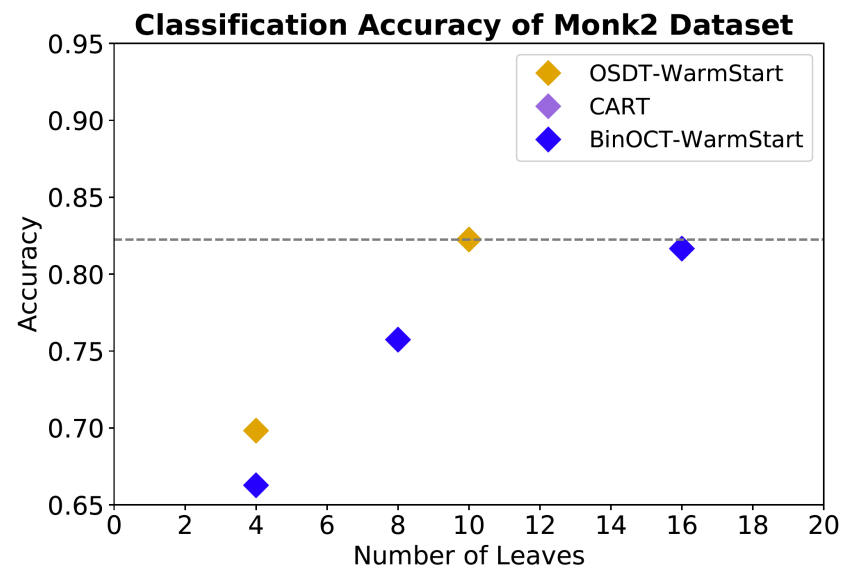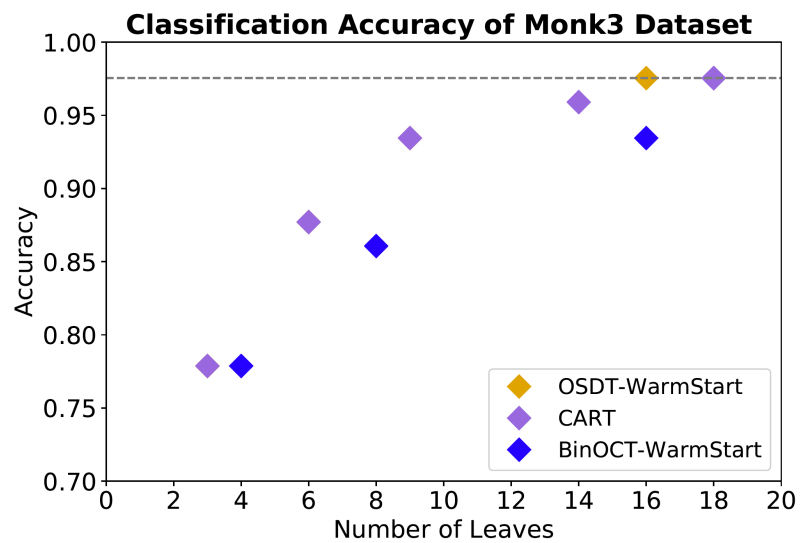

**Classification Accuracy of COMPAS Dataset**

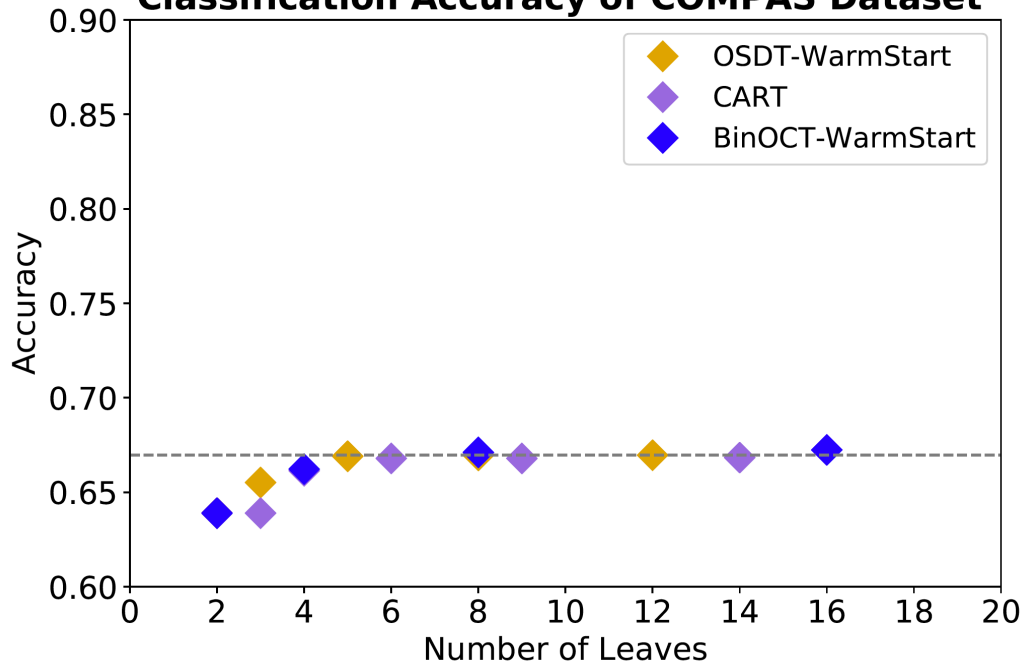

**Classification Accuracy of Tic-Tac-Toe Dataset**

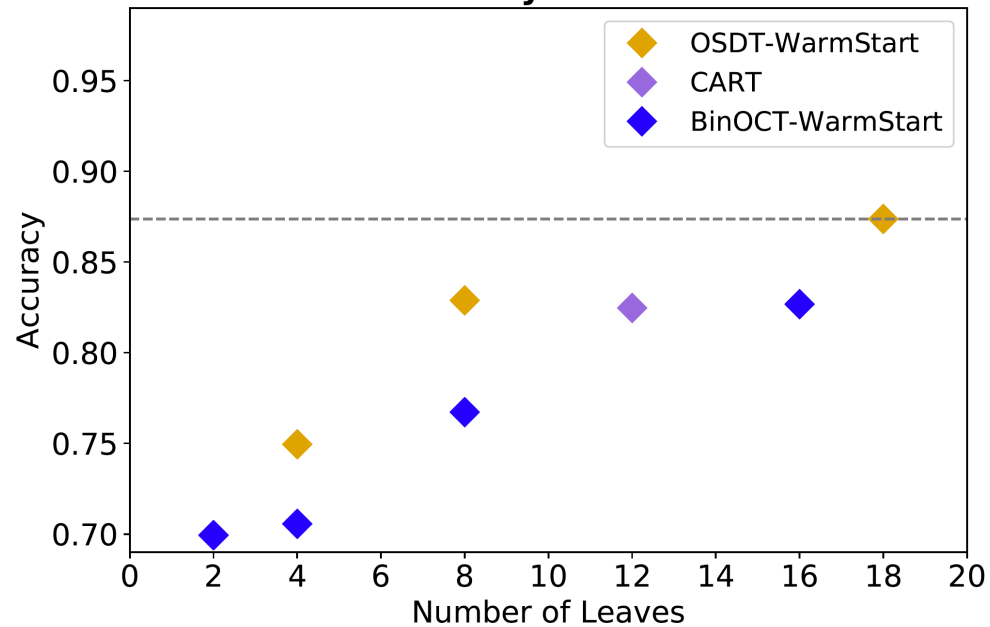

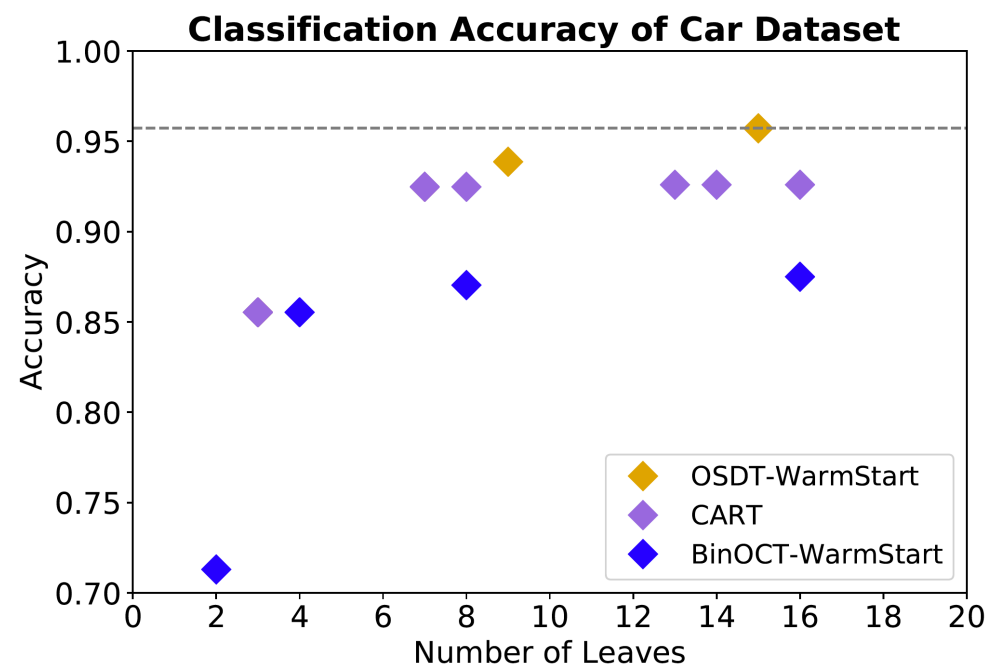

## Monk 1 dataset

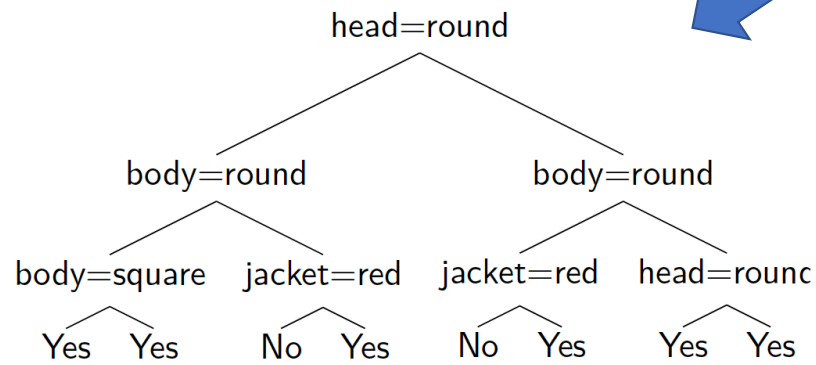

**(a) Bin CT (accuracy: 91.129%)**

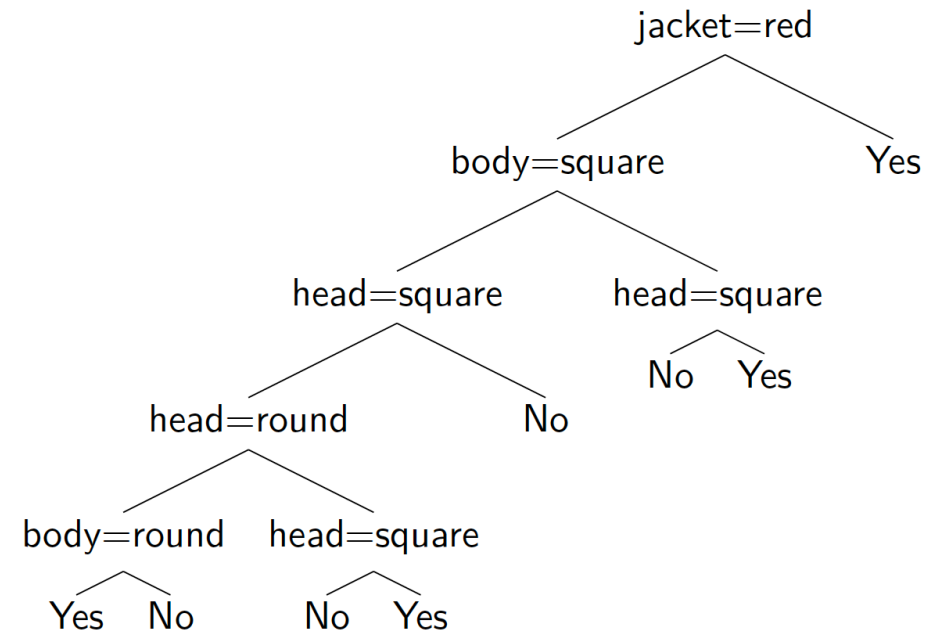

**(b) OSDT (accuracy: 100%)**

## COMPAS dataset

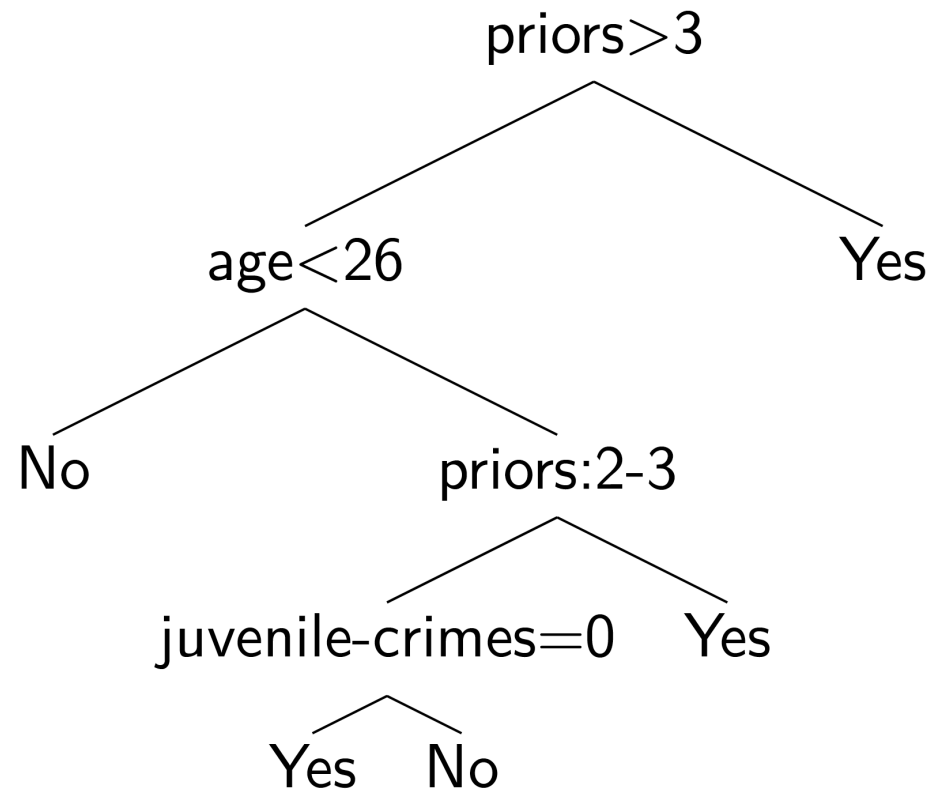

**Execution Traces of OSDT, RBinOCT and CART (tictactoe Dataset)**

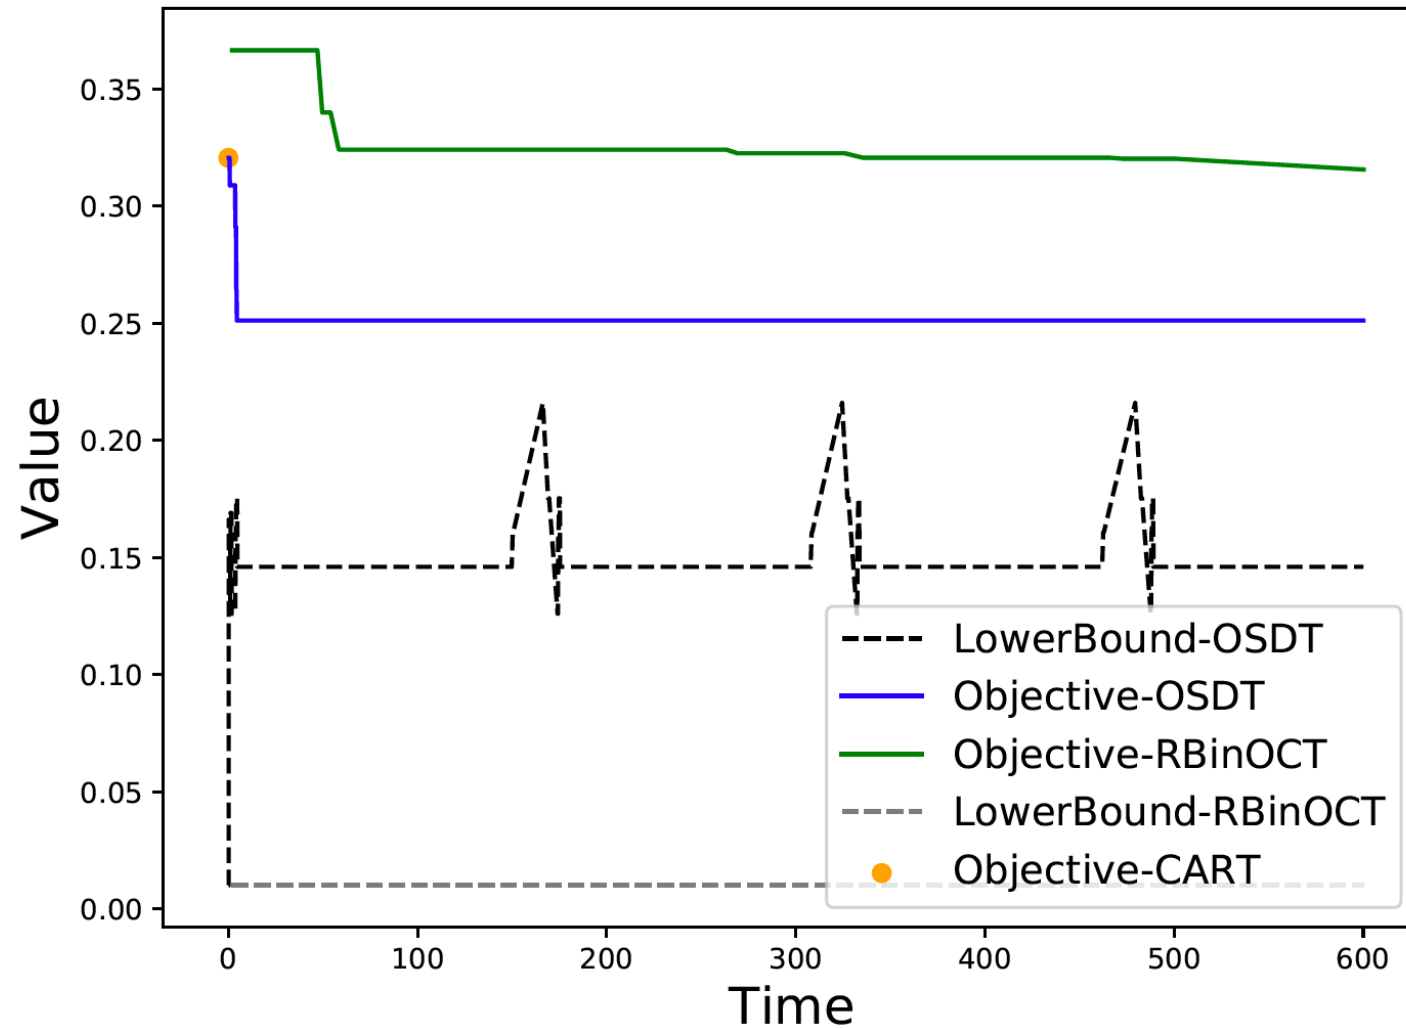

# Summarize

- First practical method for optimal sparse binary split decision trees
- Current work:
  - Non-straightforward speedup for continuous variables
  - Generalization to other objectives



Xiyang Hu, Cynthia Rudin, Margo Seltzer. Optimal Sparse Decision Trees.

<https://arxiv.org/abs/1904.12847>
